# Supplementary material for: TTTCA Repeat Expansion of SAMD12 in a New Benign Adult Familial Myoclonic Epilepsy Pedigree
Source: PubMed Central journal article supplement (PMC7055650; doi:10.3389/fneur.2020.00068), 2020-02-26
Supplement: Data_Sheet_1.pdf [file Data_Sheet_1.pdf]

## Supplementary Materials

### 1 Supplementary Tables

**Supplementary Table 1:** Primers used for RP-PCR

| Reaction            | Primer name          | Primers (5'→3')                |
|---------------------|----------------------|--------------------------------|
| TTTTA<br>repeat PCR | <i>SAMD12</i> STRF   | CCTTATCCTTCTCTGAAATAATACTTCAT  |
|                     | <i>SAMD12</i> AAAATR | AAAATAAAATAAAATAAAATAAAATAAAAT |
| TTTCA<br>repeat PCR | <i>SAMD12</i> TTTCAF | TTTCATTTTCATTTTCATTTTCATT      |
|                     | <i>SAMD12</i> FSTRR2 | Gcctgggcaacaagagtga            |
| Specific<br>PCR     | <i>SAMD12</i> PreF   | tgtgcagCCATTGGTCCAGTCTT        |
|                     | <i>SAMD12</i> PreR2  | GCTGGCAAagttcagaggtcactt       |

**Supplementary Table 2:** Number of TTTTA and TTTCA repeats of the pedigree

| Individuals | Number of TTTTA repeat | Number of TTTCA repeat | Individuals | Number of TTTTA repeat | Number of TTTCA repeat |
|-------------|------------------------|------------------------|-------------|------------------------|------------------------|
| III-7       | >60                    | >111                   | III14       | 14                     | 17                     |
| III-13      | >60                    | >106                   | IV20        | 14                     | 17                     |
| III-15      | >57                    | >87                    | IV4         | 17                     | 21                     |
| III-19      | >58                    | >96                    | III6        | 17                     | 20                     |
| III-20      | >57                    | >100                   | III26       | 17                     | 19                     |
| IV6         | >57                    | >105                   | III23       | 17                     | 20                     |
| IV15        | >61                    | >103                   | IV12        | 17                     | 21                     |
| IV19        | >59                    | >100                   | IV14        | 17                     | 21                     |
| IV23        | >55                    | >105                   | III18       | 17                     | 20                     |
| IV24        | >58                    | >102                   | IV26        | 12                     | 17                     |
| III-8       | NA                     | NA                     | III30       | 17                     | 19                     |
| IV-18       | NA                     | NA                     | III22       | 12                     | 18                     |
| III-21      | >56                    | 29                     | III32       | 19                     | 20                     |
| IV-25       | >58                    | 17                     | IV3         | 17                     | 20                     |
| IV1         | 17                     | 20                     | III2        | 19                     | 20                     |
| III4        | 20                     | 21                     | IV28        | 17                     | 20                     |
| IV22        | 17                     | 19                     | IV21        | 17                     | 20                     |

NA, DNA not available.

**Supplementary Table 3: Scales examination of BAFME patients and unrelated healthy controls**

“/” represents data unavailable.

| Individuals | sex | age | UMRS | FTRS | MMSE | DST | VFT |
|-------------|-----|-----|------|------|------|-----|-----|
| III-7       | F   | 62  | 0    | 14   | 28   | 20  | 16  |
| III-13      | F   | 60  | 0    | 22   | 27   | 15  | 14  |
| III-15      | F   | 59  | 0    | 12   | 28   | 36  | 12  |
| III-19      | F   | 50  | 2    | 16   | 28   | /   | /   |
| III-20      | M   | 47  | 0    | 12   | 27   | 90  | 12  |
| IV6         | F   | 41  | 18   | 22   | /    | 40  | 10  |
| IV15        | F   | 42  | 10   | 16   | /    | 71  | 19  |
| IV19        | M   | 33  | 10   | 12   | 28   | 36  | 12  |
| IV23        | M   | 29  | 0    | 11   | 29   | 30  | 22  |
| IV24        | M   | 27  | 0    | 4    | 30   | 55  | 14  |
| III-8       | F   | 66  | 0    | 2    | 29   | 20  | 12  |
| IV-18       | F   | 30  | 0    | /    | /    | /   | /   |
| C1          | M   | 61  | /    | /    | 29   | 26  | 22  |
| C2          | F   | 44  | /    | /    | 30   | 29  | 11  |
| C3          | F   | 56  | /    | /    | 29   | 19  | 15  |
| C4          | F   | 27  | /    | /    | 30   | 72  | 24  |
| C5          | M   | 24  | /    | /    | 30   | 73  | 23  |
| C6          | F   | 27  | /    | /    | 30   | 90  | 22  |
| C7          | M   | 25  | /    | /    | 30   | 63  | 20  |
| C8          | M   | 38  | /    | /    | 30   | 67  | 17  |
| C9          | F   | 40  | /    | /    | 30   | 59  | 27  |
| C10         | M   | 53  | /    | /    | 29   | 27  | 20  |

## 2 Supplementary Figure

### Supplementary Figure 1:

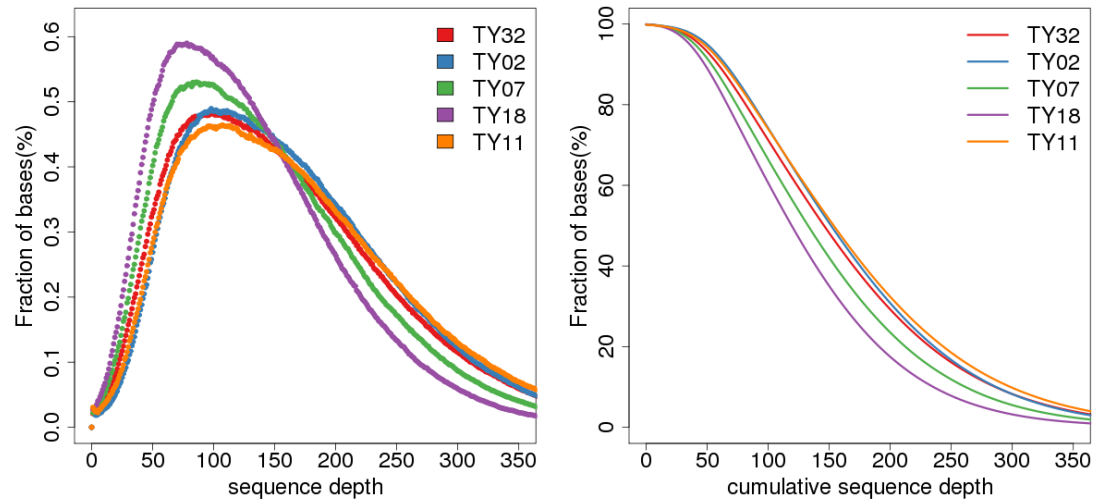

**Figure 1:** Sequence depth of WES for individuals in the pedigree
